# Synthetic-Type Control Charts for Time-Between-Events Monitoring

Fang Yen Yen<sup>1\*</sup>, Khoo Michael Boon Chong<sup>1</sup>, Lee Ming Ha<sup>2</sup>

**1** School of Mathematical Sciences, Universiti Sains Malaysia, Penang, Malaysia, **2** School of Engineering, Computing and Science, Swinburne University of Technology, Sarawak Campus, Kuching, Sarawak, Malaysia

## Abstract

This paper proposes three synthetic-type control charts to monitor the mean time-between-events of a homogenous Poisson process. The first proposed chart combines an Erlang (cumulative time between events,  $T_r$ ) chart and a conforming run length (CRL) chart, denoted as Synth- $T_r$  chart. The second proposed chart combines an exponential (or  $T$ ) chart and a group conforming run length (GCRL) chart, denoted as GR- $T$  chart. The third proposed chart combines an Erlang chart and a GCRL chart, denoted as GR- $T_r$  chart. By using a Markov chain approach, the zero- and steady-state average number of observations to signal (ANOS) of the proposed charts are obtained, in order to evaluate the performance of the three charts. The optimal design of the proposed charts is shown in this paper. The proposed charts are superior to the existing  $T$  chart,  $T_r$  chart, and Synth- $T$  chart. As compared to the EWMA- $T$  chart, the GR- $T$  chart performs better in detecting large shifts, in terms of the zero- and steady-state performances. The zero-state Synth- $T_4$  and GR- $T_r$  ( $r=3$  or  $4$ ) charts outperform the EWMA- $T$  chart for all shifts, whereas the Synth- $T_r$  ( $r=2$  or  $3$ ) and GR- $T_2$  charts perform better for moderate to large shifts. For the steady-state process, the Synth- $T_r$  and GR- $T_r$  charts are more efficient than the EWMA- $T$  chart in detecting small to moderate shifts.

**Citation:** Yen FY, Chong KMB, Ha LM (2013) Synthetic-Type Control Charts for Time-Between-Events Monitoring. PLoS ONE 8(6): e65440. doi:10.1371/journal.pone.0065440

**Editor:** Miguel A. Fernandez, Universidad de Valladolid, Spain

**Received:** December 31, 2012; **Accepted:** April 24, 2013; **Published:** June 3, 2013

**Copyright:** © 2013 Yen et al. This is an open-access article distributed under the terms of the Creative Commons Attribution License, which permits unrestricted use, distribution, and reproduction in any medium, provided the original author and source are credited.

**Funding:** This research is supported by the MyBrain15 (MyPhD) Scholarship Program under the Ministry of Higher Education Malaysia and the Fundamental Research Grant Scheme (FRGS), no. 203/PMATHS/6711232. The funders had no role in study design, data collection and analysis, decision to publish, or preparation of the manuscript.

**Competing Interests:** The authors have declared that no competing interests exist.

\* E-mail: fangyenyen@hotmail.com

## Introduction

A control chart is one of the important statistical tools in process quality control to distinguish between the variation due to natural cause and assignable cause. Traditionally, control charts with the three-sigma limits, such as the Shewhart-type  $\bar{X}$  chart,  $R$  chart,  $S$  chart, and so on were developed to monitor process quality. Most of these traditional charts are based on the normality assumption or approximation of the underlying process distribution [1]. However, the development of modern technology and process improvement has led to zero-defects or high quality processes, where the defect rate could be very small, up to parts per million [2,3]. Traditional control charts are not suitable for monitoring such high quality processes since these charts will face certain practical problems including meaningless control limits, higher false alarm rates and failures in detecting process improvement [3,4].

Due to the inadequacies of traditional control charts, time-between-events (TBE) charts were introduced as alternatives for monitoring high quality processes when non-conforming items are rarely observed. Instead of monitoring the number or proportion of events occurring in a certain sampling interval, the TBE charts monitor the time between successive occurrences of events. The term “events” may refer to the occurrences of non-conforming items in a manufacturing process [3], failure in reliability analysis [5,6,7], disease in healthcare management [8], accidents [9], arrival of a customer, etc. The term “time” may also refer to other

variables (discrete-type or continuous-type) that measure the quantity observed between the occurrences of events [2]. Therefore, the TBE charts can be used for monitoring any processes with TBE or inter-arrival time random variable. These includes time between component failures in maintenance monitoring [6], time between medical errors [10], time between two consecutive radiation pulses [11], time between asthma attacks [12] and so on [8,13,14,15].

The TBE chart was first developed by Calvin [3] and was further studied by Goh [4], as cumulative count of conforming (CCC) chart based on probability limits. Since then, the conforming run length (CRL) control chart was proposed and has been studied for better interpretation purposes [16,17]. The CRL chart is also known as the geometric chart [18]. As an extension to the CCC chart, the CCC- $r$  chart (or negative binomial chart) was developed to increase the sensitivity in detecting shifts [19,20]. Radaelli [15] provided a general unified strategy for planning the Shewhart-type TBE chart to monitor the arrival time between successive counts.

Chan et al. [21] proposed a continuous counterpart of the CCC chart called the Cumulative Quantity Control (CQC) chart for monitoring continuous TBE data. It is assumed that the occurrence of an event (i.e. non-conforming item) is modeled by a homogenous Poisson process with a constant rate or mean. Then the observed TBE follows an exponential distribution and the suggested chart is the  $t$ -chart, exponential chart or  $T$  chart [5,22]. Xie et al. [5] extended the CQC chart to the CQC- $r$  chart, called

the  $t_r$ -chart or  $T_r$  chart. The CQC- $r$  chart is based on the Erlang or Gamma distribution which monitors the cumulative quantity until the  $r^{\text{th}}$  event is observed. The CQC- $r$  chart is named as the gamma chart by Zhang et al. [23].

Besides the TBE charts based on probability limits, the TBE charts based on the CUSUM or EWMA method have also been proposed to monitor both variables and attributes TBE data. These include the Poisson CUSUM and exponential CUSUM or  $t$ -CUSUM charts [24,25]; geometric CUSUM and geometric EWMA charts [26,27,28]; exponential EWMA or EWMA- $T$  chart [29], exponential EWMA chart with estimated parameter [30] and so on. The robustness studies of the exponential CUSUM and exponential EWMA charts showed that these charts can be designed to be extremely robust to departures from the assumed distribution [31,32].

Comparisons of the CQC, CQC- $r$ , exponential CUSUM, as well as the exponential EWMA charts have been carried out by Liu et al. [33], Sharma et al. [34] and Liu et al. [35]. It was concluded that in detecting a large shift, the CQC- $r$  chart can be considered, and for a quick detection of small to moderate shifts, the exponential EWMA or exponential CUSUM is superior to both the CQC and CQC- $r$  charts. The exponential EWMA and CUSUM charts have quite similar performances.

Other types of TBE charts have also been proposed. For example, Qu et al. [22] integrated the  $T$  and  $T$ -CUSUM charts to monitor the exponentially distributed TBE data; a synthetic chart for exponential data was proposed by Scariano & Calzada [36]; the economic designs of the exponential chart and Gamma chart were also suggested [37,38,39]; while Jones & Champ [40] studied the phase I TBE chart. Although the TBE charts were initially developed for high quality process monitoring, it can be used also for moderate defective rate processes, provided that the data collected are of the TBE-type. Other advantages of a TBE chart include its ability to detect process improvement, it does not require rational subgroup of samples and it is applicable for any sample size. Those continuous-type TBE charts discussed so far are based on the exponential or gamma distribution, which is the focus of this paper.

A  $\bar{X}$  chart in combining with a CRL chart (a discrete-type TBE chart), called a synthetic chart was proposed by Wu & Spedding [41]. Davis & Woodall [42] derived a Markov chain approach for the calculation of the zero- and steady-state (average run length) ARL performance of the synthetic  $\bar{X}$  chart. It was shown that the synthetic chart performs better than its counterpart, the Shewhart  $\bar{X}$  chart. However, the EWMA and CUSUM charts are still superior to the synthetic chart in detecting small to moderate shifts. The synthetic chart has also been studied by others for monitoring attribute data (such as by combining a  $np$  chart and a CRL chart) and multivariate data (such as by combining a Hotelling's  $T^2$  chart and a CRL chart) [43,44,45,46]. The optimal statistical and economic designs of the synthetic chart have also been developed [47,48].

As an extension to the synthetic chart, Gadre & Rattihalli [49] proposed the group runs (GR) chart, which consists of a combination of a  $\bar{X}$  chart and an extended version of CRL chart. The GR chart is also a synthetic-type chart. In this research, we name the extended version of the CRL chart as the group conforming run length chart (GCRL). Basically, the GCRL chart is similar to the CRL chart, except for the decision making procedure. The performance of the GR chart is better than the synthetic  $\bar{X}$  chart, as well as the Shewhart  $\bar{X}$  chart.

The synthetic chart based on the exponential data proposed by Scariano & Calzada [36] combines a  $T$  chart and a CRL chart. In this study, we refer to this chart as the Synth- $T$  chart. The zero-

state ARL performance of the Synth- $T$  chart was studied using a direct formulation method. It has been shown that the zero-state Synth- $T$  chart outperforms the standard  $T$  chart, whereas the exponential EWMA and CUSUM charts are still superior to the Synth- $T$  chart, except for very large shifts.

From the literatures, it can be concluded that, the  $T_r$  and Synth- $T$  charts perform better than the  $T$  chart. However, the Synth- $T$  chart is not effective than the EWMA- $T$  chart in detecting almost all shifts, while the  $T_r$  chart has a better performance than the EWMA- $T$  in detecting large shifts, especially when  $r$  is larger (i.e.  $r=4$ ). Thus, for a quicker detection of the mean TBE shifts, we propose a type of synthetic chart, called the Synth- $T_r$  chart which combines a  $T_r$  chart and a CRL chart. Furthermore, a better performance of the GR chart as compared to the synthetic chart has motivated us to integrate the GR scheme and the TBE chart. Thus, two other types of synthetic charts, called the GR- $T$  chart (combined  $T$  chart and GCRL chart) and GR- $T_r$  chart (combined  $T_r$  chart and GCRL chart) are proposed in this paper as well. From an overall perspective, the proposed charts are expected to outperform the existing  $T$ ,  $T_r$ , Synth- $T$  and EWMA- $T$  charts.

Although the idea of combining different control charts, like combining  $\bar{X}$  chart and CRL chart to form the synthetic  $\bar{X}$  chart, combining  $T^2$  chart and CRL chart to form the synthetic  $T^2$  chart, and so on exist in the literature, it should be pointed out that the work in this paper of combining different types of control charts (i.e.  $T_r$  chart and CRL chart to form the Synth- $T_r$  chart,  $T$  chart and GCRL chart to form the GR- $T$  chart,  $T_r$  chart and GCRL chart to form the GR- $T_r$  chart) is not yet in existence in the literature.

The next section gives a brief overview of the  $T$ ,  $T_r$ , Synth- $T$  and EWMA- $T$  charts. In Section 3, the implementation procedures of the proposed charts are given. The performance evaluation of the charts, based on the average number of observations to signal (ANOS) is derived using the Markov chain approach. An optimal design based on ANOS is explained. This is followed by a comparative study of the proposed charts and the  $T$ ,  $T_r$ , Synth- $T$  and EWMA- $T$  charts in Section 4. It was found that overall the proposed charts increase the speed of mean shift detection, especially the GR- $T_r$  chart. A discussion on the results obtained is given in the same section. Section 5 illustrates the implementation of the proposed charts with three examples. Finally, conclusions are drawn in Section 6 based on the findings of this study.

## Literature Review: A Review on Time-Between-Events Control Charts

Assume that a homogenous Poisson process with events occurrence rate of  $\gamma$  is being monitored. The time-between-events (TBE),  $X_i (i=1,2,\dots)$  is an independently and identically distrib-

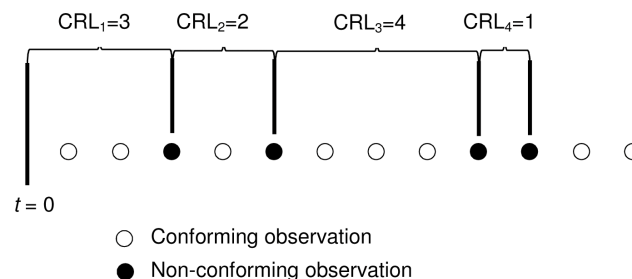

**Figure 1. Conforming run length.**  
doi:10.1371/journal.pone.0065440.g001

uted exponential random variable with cumulative distribution function (cdf) [21]

$$F_T(x) = 1 - \exp\left(-\frac{x}{\beta}\right), \quad x \geq 0. \quad (1)$$

Here,  $\beta$  is the mean TBE, which is a reciprocal of the events occurrence rate  $\gamma$  such that  $\beta = 1/\gamma$ . For detecting process deterioration or decreases in the mean TBE (increases in the Poisson rate of occurrences of events), lower-sided control charts are presented in this article.

### The $T$ chart and $T_r$ chart

In the monitoring of the exponential TBE (time until an event,  $X$ ) based on probability control limits in Equation (1), the lower-sided  $T$  chart has the centre line ( $CL_T$ ) and lower control limit ( $LCL_T$ ) as follows [21]:

$$CL_T = \beta_0 \ln(2) \quad (2)$$

$$LCL_T = -\beta_0 \ln(1 - \alpha_T), \quad (3)$$

where  $\beta_0$  is the in-control mean TBE. Note that  $CL_T$  is independent of the given acceptable Type-I error probability,  $\alpha_T \in (0, 1)$ .

The  $T_r$  chart, based on the Erlang distribution was proposed in order to increase the sensitivity of the  $T$  chart. When the TBE is modeled by the exponential distribution, the cumulative of a fixed number,  $r$  of the TBE (time until the  $r^{\text{th}}$  event,  $Y_r$ , in a Poisson process) follows the Erlang distribution with cdf [5]

$$F_{T_r}(y_r) = 1 - \sum_{k=0}^{r-1} \frac{(y_r/\beta)^k}{k!} \exp\left(-\frac{y_r}{\beta}\right), \quad y_r \geq 0, \quad (4)$$

where  $\beta$  and  $r$  are the parameters of the Erlang distribution and  $Y_r = \sum_{i=1}^r X_i$ . For a given Type-I error probability  $\alpha_{T_r}$ , the centre line ( $CL_{T_r}$ ) and lower control limit ( $LCL_{T_r}$ ) of the  $T_r$  chart are easily obtained by solving the following equations [5]:

$$F_{T_r}(CL_{T_r}) = 1 - \sum_{k=0}^{r-1} \frac{(CL_{T_r}/\beta_0)^k}{k!} \exp\left(-\frac{CL_{T_r}}{\beta_0}\right) = \frac{1}{2} \quad (5)$$

**Table 1.** The non-absorbing states of the Synth- $T_r$  chart in the Markov chain when  $L = 3$ .

| State Number | Non-absorbing State  |
|--------------|----------------------|
| 1            | 000                  |
| 2            | 0001 (initial state) |
| 3            | 00010                |
| 4            | 000100               |

doi:10.1371/journal.pone.0065440.t001

**Table 2.** The non-absorbing states of the GR- $T_r$  chart in the Markov chain when  $L = 3$ .

| State Number | Non-absorbing State   | State Number | Non-absorbing State |
|--------------|-----------------------|--------------|---------------------|
| 1            | 000                   | 8            | 000110              |
| 2            | 0001                  | 9            | 0001010             |
| 3            | 00010                 | 10           | 00010010            |
| 4            | 000100                | 11           | 0001100             |
| 5            | 00011 (initial state) | 12           | 00010100            |
| 6            | 000101                | 13           | 000100100           |
| 7            | 0001001               |              |                     |

doi:10.1371/journal.pone.0065440.t002

$$F_{T_r}(LCL_{T_r}) = 1 - \sum_{k=0}^{r-1} \frac{(LCL_{T_r}/\beta_0)^k}{k!} \exp\left(-\frac{LCL_{T_r}}{\beta_0}\right) = \alpha_{T_r} \quad (6)$$

### The EWMA- $T$ (exponential EWMA) Chart

The statistics for the lower-sided EWMA- $T$  chart is [29]

$$Z_t = \min\{B, \lambda X_t + (1 - \lambda)Z_{t-1}\}, \quad t = 1, 2, \dots \quad (7)$$

Here,  $B$  is a positive boundary and  $\lambda$  is a smoothing constant such that  $0 < \lambda \leq 1$ . The starting value  $Z_0$  is usually chosen as the process target,  $\beta_0$  which is the in-control mean TBE. The centre line ( $CL_{E-T}$ ) and lower control limit ( $LCL_{E-T}$ ) of the EWMA- $T$  chart are [50].

$$CL_{E-T} = E(Z_t) = \beta_0, \quad (8)$$

$$LCL_{E-T} = \beta_0 - \eta \sqrt{\text{Var}(Z_t)} = \beta_0 \left(1 - \eta \sqrt{\frac{\lambda}{2 - \lambda}}\right), \quad (9)$$

where  $\eta$  is the parameter that determines the width of the lower limit. The process is assumed to be out-of-control if  $Z_t < LCL_{E-T}$ . The boundary  $B$  in Equation (7) is set to be  $LCL_{E-T} < \beta_0 \leq B$  to ensure that the  $Z_t$  is at most a certain distance away from the  $LCL_{E-T}$ . In this study,  $B = 2$  is selected (when  $\beta_0 = 1$ ) for a better overall performance [29,30,31]. Performance analysis based on ANOS using the Markov chain approach of Brook & Evans [51] is adopted in this comparative study. The ANOS derivation based on the Markov chain method can be found in the Appendix S1.

### The Synth- $T$ chart

The synthetic chart based on the exponential data instead of the normal distributed data has been developed by Scariano & Calzada [36]. It is a combination of a lower-sided Shewhart individual sub-chart and a CRL sub-chart. The lower-sided Shewhart individual sub-chart is also the  $T$  chart of Chan et al. [21] and the CRL sub-chart is that of Bourke [17]. In this study,

**Table 3.** The zero- and steady-state ANOS( $\hat{\rho}_{opt}$ )s together with optimal parameters of the TBE charts based on  $\hat{\rho}_{opt}=0.2, 0.5$  and ANOS<sub>0</sub> = 500.

| Mode         | $\hat{\rho}_{opt}$ | $T$<br>(LCL)               | $T_2$<br>(LCL)                     | $T_3$<br>(LCL)               | $T_4$<br>(LCL)               | EWMA- $T$<br>( $\lambda$ , LCL)       |
|--------------|--------------------|----------------------------|------------------------------------|------------------------------|------------------------------|---------------------------------------|
| Zero-state   | 0.2                | 100.501<br>(0.0020)        | 25.534<br>(0.0902)                 | 11.082<br>(0.3610)           | 7.439<br>(0.7710)            | 6.857<br>(0.35, 0.2377)               |
|              | 0.5                | 250.500<br>(0.0020)        | 133.440<br>(0.0920)                | 81.361<br>(0.3610)           | 56.319<br>(0.7710)           | 18.649<br>(0.1, 0.5450)               |
| Steady-state | 0.2                | 100.501<br>(0.0020)        | 25.534<br>(0.0920)                 | 11.082<br>(0.3610)           | 7.439<br>(0.7710)            | 6.470<br>(0.35, 0.2373)               |
|              | 0.5                | 250.500<br>(0.0020)        | 133.440<br>(0.0920)                | 81.361<br>(0.3610)           | 56.319<br>(0.7710)           | <b>18.227</b><br><b>(0.1, 0.5439)</b> |
|              |                    | Synth- $T$<br>( $L$ , LCL) | Synth- $T_2$<br>( $L$ , LCL)       | Synth- $T_3$<br>( $L$ , LCL) | Synth- $T_4$<br>( $L$ , LCL) | Synth- $T_5$<br>( $L$ , LCL)          |
| Zero-state   | 0.2                | 23.965<br>(1, 0.0457)      | 5.330<br>(2, 0.3358)               | 3.913<br>(2, 0.8543)         | 4.276<br>(1, 1.6747)         | 5.069<br>(1, 2.4325)                  |
|              | 0.5                | 131.069<br>(1, 0.0457)     | 50.193<br>(3, 0.3012)              | 28.001<br>(4, 0.7455)        | 19.705<br>(3, 1.3939)        | 15.962<br>(3, 2.0731)                 |
| Steady-state | 0.2                | 27.035<br>(1, 0.0467)      | 7.377<br>(1, 0.4132)               | 5.743<br>(1, 0.9999)         | 6.346<br>(1, 1.6999)         | 7.583<br>(1, 2.4683)                  |
|              | 0.5                | 136.060<br>(1, 0.0467)     | 57.936<br>(1, 0.4132)              | 35.299<br>(2, 0.8726)        | 26.265<br>(2, 1.5193)        | 21.987<br>(2, 2.2387)                 |
|              |                    | GR- $T$<br>( $L$ , LCL)    | GR- $T_2$<br>( $L$ , LCL)          | GR- $T_3$<br>( $L$ , LCL)    | GR- $T_4$<br>( $L$ , LCL)    | GR- $T_5$<br>( $L$ , LCL)             |
| Zero-state   | 0.2                | 8.509<br>(1, 0.1346)       | <b>3.003</b><br><b>(2, 0.5433)</b> | 3.221<br>(1, 1.4621)         | 4.042<br>(1, 2.2967)         | 5.007<br>(1, 3.1777)                  |
|              | 0.5                | 76.070<br>(1, 0.1346)      | 26.342<br>(3, 0.4677)              | 15.350<br>(3, 1.0670)        | 11.763<br>(3, 1.7647)        | <b>10.370</b><br><b>(2, 2.7365)</b>   |
| Steady-state | 0.2                | 12.138<br>(1, 0.1413)      | <b>5.594</b><br><b>(1, 0.7351)</b> | 6.321<br>(1, 1.5117)         | 8.055<br>(1, 2.3702)         | 10.008<br>(1, 3.2758)                 |
|              | 0.5                | 85.871<br>(1, 0.1413)      | 37.019<br>(2, 0.5687)              | 24.572<br>(2, 1.2435)        | 20.180<br>(2, 2.0126)        | 18.561<br>(2, 2.8376)                 |

doi:10.1371/journal.pone.0065440.t003

we denote the chart as the Synth- $T$  chart which consists of a  $T/S$  sub-chart and a CRL/ $S$  sub-chart.

**$T/S$  sub-chart.** As described in Section 2.1, the TBE,  $X$  follows an exponential distribution. Similar to Equation (3), the  $T/S$  sub-chart has the lower control limit

$$LCL_{T/S} = -\beta_0 \ln(1 - \alpha_{T/S}), \quad (10)$$

where  $\alpha_{T/S}$  is the Type-I error probability of the  $T/S$  sub-chart. The TBE observation  $X$  is said to be non-conforming (instead of out-of-control) when  $X < LCL_{T/S}$ .

**The CRL/ $S$  sub-chart.** The random variable CRL in the CRL/ $S$  sub-chart counts the number of conforming TBE observations  $X$ 's between two consecutive non-conforming ones, including the ending non-conforming TBE observation  $X$ , from the  $T/S$  sub-chart. The CRL follows a geometric distribution with cdf [41]

$$F_{CRL}(CRL) = 1 - (1-p)^{CRL}, \quad CRL = 1, 2, \dots, \quad (11)$$

where  $p$  is the probability of a non-conforming TBE,  $X$  on the  $T/S$  sub-chart, such that

$$p = F_T(LCL_{T/S}) = 1 - \exp\left(-\frac{LCL_{T/S}}{\beta}\right). \quad (12)$$

Since the detection of an increase in  $p$  is the only concern, the lower control limit of the CRL/ $S$  sub-chart,  $L_{CRL/S}$  (rounded to an integer) is sufficient [16,41]

$$L_{CRL/S} = \frac{\ln(1 - \alpha_{CRL/S})}{\ln(1 - p_0)}. \quad (13)$$

Here,  $p_0$  is the in-control probability of a non-conforming TBE,  $X$  on the  $T/S$  sub-chart and  $\alpha_{CRL/S}$  is the Type-I error probability of the CRL/ $S$  sub-chart. Assume that the process starts at  $t=0$ , then Figure 1 shows the counts of the CRL, where  $CRL_1 = 3$ ,  $CRL_2 = 2$ ,  $CRL_3 = 4$ ,  $CRL_4 = 1$ .

## Methodology: Development of the Proposed Charts

This section shows the development of the proposed Synth- $T_r$ , GR- $T$  and GR- $T_r$  charts. The Synth- $T_r$  chart consists of a  $T_r/S$  sub-chart and a CRL/ $S$  sub-chart while the GR- $T$  chart consists of a  $T/S$  sub-chart and a GCRL/ $S$  sub-chart. Meanwhile the GR- $T_r$  chart consists of a  $T_r/S$  sub-chart and a GCRL/ $S$  sub-chart. Since the GR- $T_r$  chart reduces to the Synth- $T_r$  and GR- $T$  charts under some special conditions, the implementation procedure of the GR- $T_r$  chart will be discussed first, followed by the other two charts.

**Table 4.** Zero- and steady-state ANOS based on  $ANOS_0 = 500$  and  $\hat{\rho}_{opt} = 0.2$ .

| $\hat{\rho}$ | EWMA- $T$ | Synth- $T$   | Synth- $T_2$ | Synth- $T_3$  | Synth- $T_4$   | Synth- $T_5$   | GR- $T$      | GR- $T_2$     | GR- $T_3$      | GR- $T_4$      | GR- $T_5$      |
|--------------|-----------|--------------|--------------|---------------|----------------|----------------|--------------|---------------|----------------|----------------|----------------|
| Zero-state   |           |              |              |               |                |                |              |               |                |                |                |
| 1.00         | 500.142   | 500.047      | 500.445      | 500.080       | 500.012        | 500.117        | 500.686      | 500.033       | 500.089        | 500.132        | 500.113        |
| 0.95         | 380.594   | 453.339      | 417.969      | 393.463       | <b>378.412</b> | <b>364.921</b> | 433.756      | 391.899       | <b>369.331</b> | <b>351.356</b> | <b>337.346</b> |
| 0.90         | 288.184   | 407.954      | 346.214      | 306.793       | 284.046        | 264.441        | 373.082      | 304.278       | 270.501        | 245.336        | 226.848        |
| 0.85         | 217.234   | 364.965      | 284.201      | 236.930       | 211.429        | 190.359        | 318.360      | 233.892       | 196.453        | 170.362        | 152.275        |
| 0.80         | 163.120   | 324.369      | 230.999      | 181.126       | 156.042        | 136.188        | 269.280      | 177.878       | 141.476        | 117.751        | 102.219        |
| 0.70         | 91.240    | 250.359      | 147.539      | 102.443       | 82.873         | 68.667         | 186.817      | 99.365        | 71.603         | 55.779         | 46.539         |
| 0.60         | 50.927    | 185.925      | 89.326       | 55.296        | 42.691         | 34.310         | 123.233      | 52.763        | 35.246         | 26.537         | 22.044         |
| 0.50         | 28.786    | 131.069      | 50.611       | <b>28.467</b> | 21.578         | 17.436         | 76.070       | <b>26.544</b> | 17.118         | 13.110         | 11.403         |
| 0.40         | 16.806    | 85.789       | 26.398       | 14.114        | 11.032         | 9.495          | 42.866       | 12.705        | 8.492          | 7.144          | 6.925          |
| 0.30         | 10.358    | 50.087       | 12.457       | 7.008         | 6.135          | 6.086          | 21.164       | 5.948         | 4.647          | 4.715          | 5.310          |
| 0.25         | 8.347     | 35.828       | <b>8.226</b> | 5.098         | 4.926          | 5.367          | 13.859       | 4.140         | 3.719          | 4.232          | 5.070          |
| 0.20         | 6.857     | 23.965       | 5.330        | 3.912         | 4.276          | 5.069          | 8.509        | 3.003         | 3.221          | 4.041          | 5.007          |
| 0.15         | 5.742     | 14.498       | 3.468        | 3.270         | 4.035          | 5.003          | <b>4.811</b> | 2.353         | 3.031          | 4.002          | 5.000          |
| 0.10         | 4.888     | 7.432        | 2.413        | 3.027         | 4.000          | <u>5.000</u>   | 2.471        | 2.061         | 3.000          | 4.000          | <u>5.000</u>   |
| 0.05         | 4.196     | <b>2.786</b> | 2.019        | 3.000         | 4.000          | 5.000          | 1.234        | 2.000         | 3.000          | 4.000          | 5.000          |
| 0.01         | 4.000     | 1.021        | 2.000        | 3.000         | 4.000          | 5.000          | 1.002        | 2.000         | 3.000          | 4.000          | 5.000          |
| Steady-state |           |              |              |               |                |                |              |               |                |                |                |
| 1.00         | 500.644   | 501.323      | 500.377      | 500.042       | 500.022        | 500.014        | 500.383      | 500.151       | 500.018        | 500.125        | 500.100        |
| 0.95         | 380.462   | 454.478      | 421.199      | 399.132       | 383.102        | <b>370.577</b> | 436.566      | 400.655       | <b>378.455</b> | <b>362.892</b> | <b>350.943</b> |
| 0.90         | 287.641   | 409.926      | 351.923      | 316.178       | 291.603        | 273.319        | 378.429      | 318.586       | 284.838        | 262.601        | 246.464        |
| 0.85         | 216.439   | 367.666      | 291.676      | 248.474       | 220.505        | 200.703        | 325.698      | 251.358       | 213.204        | 189.652        | 173.451        |
| 0.80         | 162.190   | 327.700      | 239.623      | 193.638       | 165.667        | 146.825        | 278.125      | 196.690       | 158.749        | 136.823        | 122.516        |
| 0.70         | 90.258    | 254.646      | 156.976      | 114.503       | 91.806         | 77.985         | 197.346      | 117.294       | 86.776         | 71.350         | 62.314         |
| 0.60         | 50.038    | 190.765      | 98.140       | 65.198        | <b>49.837</b>  | 41.431         | 133.968      | 67.332        | 46.785         | 37.786         | 33.177         |
| 0.50         | 28.037    | 136.060      | 57.940       | 35.720        | 26.795         | 22.520         | 85.871       | 37.114        | 25.193         | 20.873         | 19.212         |
| 0.40         | 16.196    | 90.531       | 31.852       | 18.937        | 14.658         | 13.106         | 50.935       | 19.677        | 13.946         | 12.636         | 12.827         |
| 0.30         | 9.870     | 54.184       | 16.048       | 9.977         | 8.698          | 8.867          | 27.052       | 10.213        | 8.466          | 9.052          | <u>10.438</u>  |
| 0.25         | 7.912     | 39.458       | 10.989       | <b>7.404</b>  | 7.172          | <u>7.957</u>   | 18.603       | <b>7.437</b>  | 7.073          | <u>8.330</u>   | 10.093         |
| 0.20         | 6.470     | 27.035       | 7.377        | 5.743         | 6.346          | 7.583          | 12.138       | 5.594         | 6.321          | 8.055          | 10.008         |
| 0.15         | 5.401     | 16.921       | <b>4.944</b> | 4.832         | <u>6.042</u>   | 7.504          | 7.411        | 4.508         | <u>6.042</u>   | 8.002          | 10.000         |
| 0.10         | 4.603     | 9.135        | 3.512        | 4.523         | 6.000          | 7.500          | <b>4.194</b> | 4.058         | 6.001          | 8.000          | 10.000         |
| 0.05         | 4.015     | <b>3.739</b> | 3.013        | <u>4.500</u>  | 6.000          | 7.500          | 2.353        | 4.000         | 6.000          | 8.000          | 10.000         |
| 0.01         | 3.669     | 1.526        | 3.000        | 4.500         | 6.000          | 7.500          | 2.000        | <u>4.000</u>  | 6.000          | 8.000          | 10.000         |

doi:10.1371/journal.pone.0065440.t004

## Implementation

Assume that a homogenous Poisson process having an in-control mean TBE  $\beta_0$  is to be monitored.

**GR- $T_r$  chart.** The implementation of the proposed GR- $T_r$  chart, which integrates the  $T_r/S$  and GCRL/ $S$  sub-charts consists of the following steps:

Step 1: Determine the optimal parameters  $(LCL_{T_r/S}, L_{GCRL/S})$ , based on the in-control and out-of-control ANOS requirements. The  $LCL_{T_r/S}$  is the lower control limit of the  $T_r/S$  sub-chart similar to Equation (6), obtained by solving

$$F_{T_r}(LCL_{T_r/S}) = 1 - \sum_{k=0}^{r-1} \frac{\left(\frac{LCL_{T_r/S}}{\beta_0}\right)^k}{k!} \times \exp\left(-\frac{LCL_{T_r/S}}{\beta_0}\right) = \alpha_{T_r/S}. \quad (14)$$

The  $L_{GCRL/S}$  is the lower limit of the GCRL/ $S$  sub-chart, i.e

$$L_{GCRL/S} = \frac{\ln(1 - \alpha_{GCRL/S})}{\ln(1 - p_0)}, \quad (15)$$

where  $p_0$  is the in-control probability of non-conforming  $\mathcal{X}_r$  on the  $T_r/S$  sub-chart and  $\alpha_{GCRL/S}$  is the Type-I error probability of the

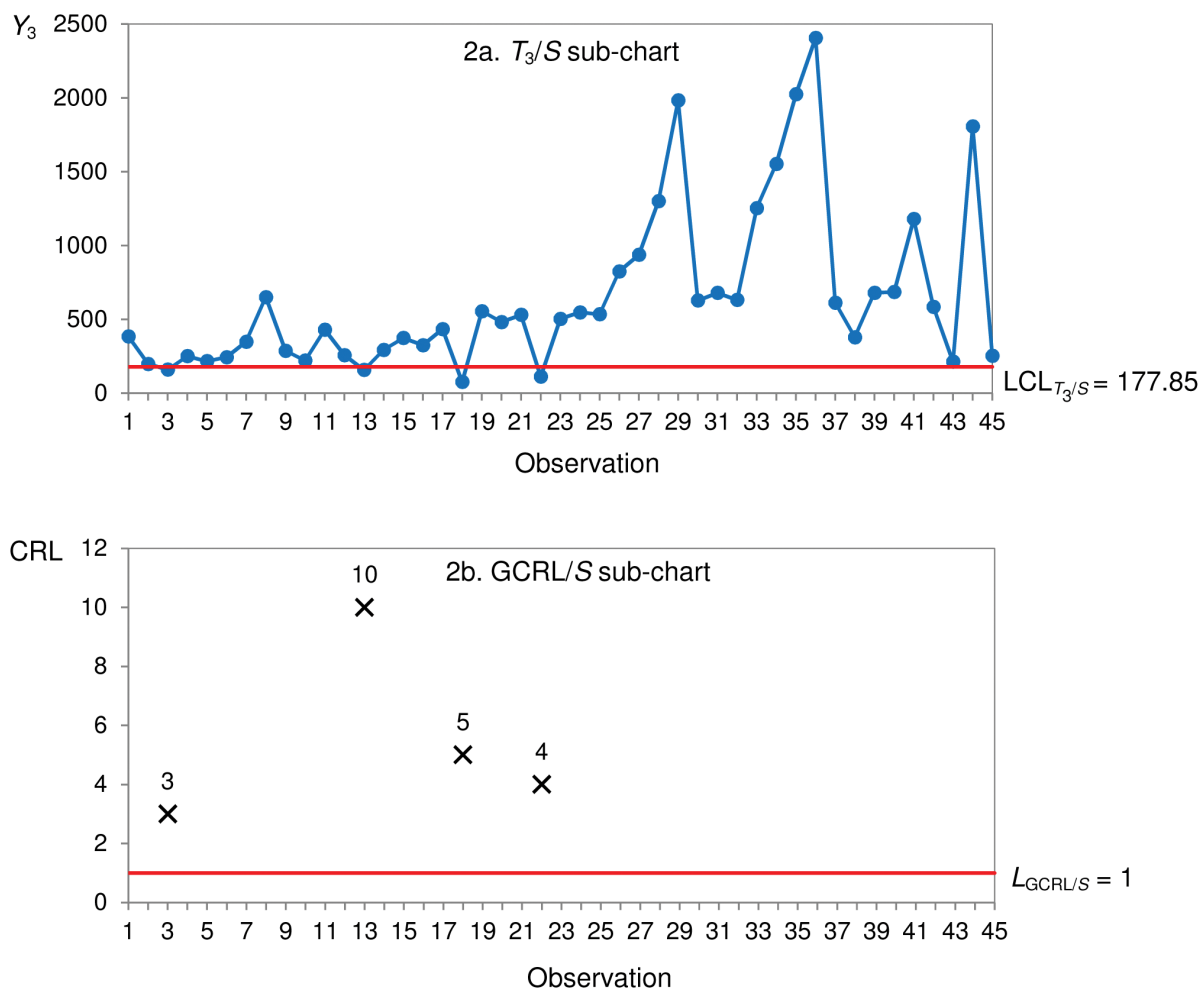

**Figure 2. GR- $T_3$  chart.**

doi:10.1371/journal.pone.0065440.g002

GCRL/ $S$  sub-chart. The calculation of ANOS, based on the Markov chain method is derived in Section 3.2, and the procedure of finding the optimal parameters is given in Section 3.3.

Step 2: Record the TBE observation,  $X$ . After the  $r^{\text{th}}$  TBE observation, calculate the sum of the  $r$  consecutive TBE observations, denoted as  $Y_r = \sum_{i=1}^r X_i$ .

Step 3: If  $Y_r < LCL_{T_r/S}$ ,  $Y_r$  is considered as non-conforming and the control flow goes to the next step. Otherwise,  $Y_r$  is conforming and the control flow returns to step 2.

Step 4: Count the number of conforming  $Y_r$  between the current and the last non-conforming  $Y_r$ . This counted number is the CRL value of the GCRL/ $S$  sub-chart. Note that a simple spreadsheet program, like Excel could be used to keep track of the count.

Step 5: If the first CRL is less than or equal to  $L_{GCRL/S}$ , (i.e.  $CRL_1 \leq L_{GCRL/S}$ ), or any two consecutive CRL are both less than or equal to  $L_{GCRL/S}$  for the first time, such that  $CRL_i \leq L_{GCRL/S}$  and  $CRL_{i+1} \leq L_{GCRL/S}$ , for  $i = 2, 3, \dots$ , the process is out-of-control and the control flow goes to the next step. Otherwise, the process is in-control and the control flow returns to Step 2.

Step 6: Signal the out-of-control status. Take actions to search and remove the assignable cause(s). Then go back to Step 2.

**Synth- $T_r$  chart.** The implementation of the proposed Synth- $T_r$  chart that combines the  $T_r/S$  and CRL/ $S$  sub-charts comprises the following steps:

Step 1 to Step 4: Determine the optimal parameters ( $LCL_{T_r/S}, L_{CRL/S}$ ), based on the in-control and out-of-control ANOS requirements. Follow the steps in the implementation of the GR- $T_r$  chart, except that the GCRL/ $S$  sub-chart is replaced by the CRL/ $S$  sub-chart. In Equation (15), the  $L_{GCRL/S}$  is replaced by the  $L_{CRL/S}$  and the  $\alpha_{GCRL/S}$  is replaced by the  $\alpha_{CRL/S}$ .

Step 5: If  $CRL \leq L_{CRL/S}$ , the process is out-of-control and the control flow goes to the next step. Otherwise, the process is in-control and the control flow returns to Step 2.

Step 6: Signal the out-of-control status. Take actions to search and remove the assignable cause(s). Then go back to Step 2.

**GR- $T$  chart.** The implementation of the proposed GR- $T$  chart which is an integration of the  $T/S$  and GCRL/ $S$  sub-charts is similar to that of the GR- $T_r$  chart when  $r = 1$  (i.e. the GR- $T_1$  chart).

**Synth- $T$  chart.** The implementation of the Synth- $T$  chart which is an integration of the  $T/S$  and CRL/ $S$  sub-charts is similar to that of the Synth- $T_r$  chart when  $r = 1$  (i.e. the Synth- $T_1$  chart).



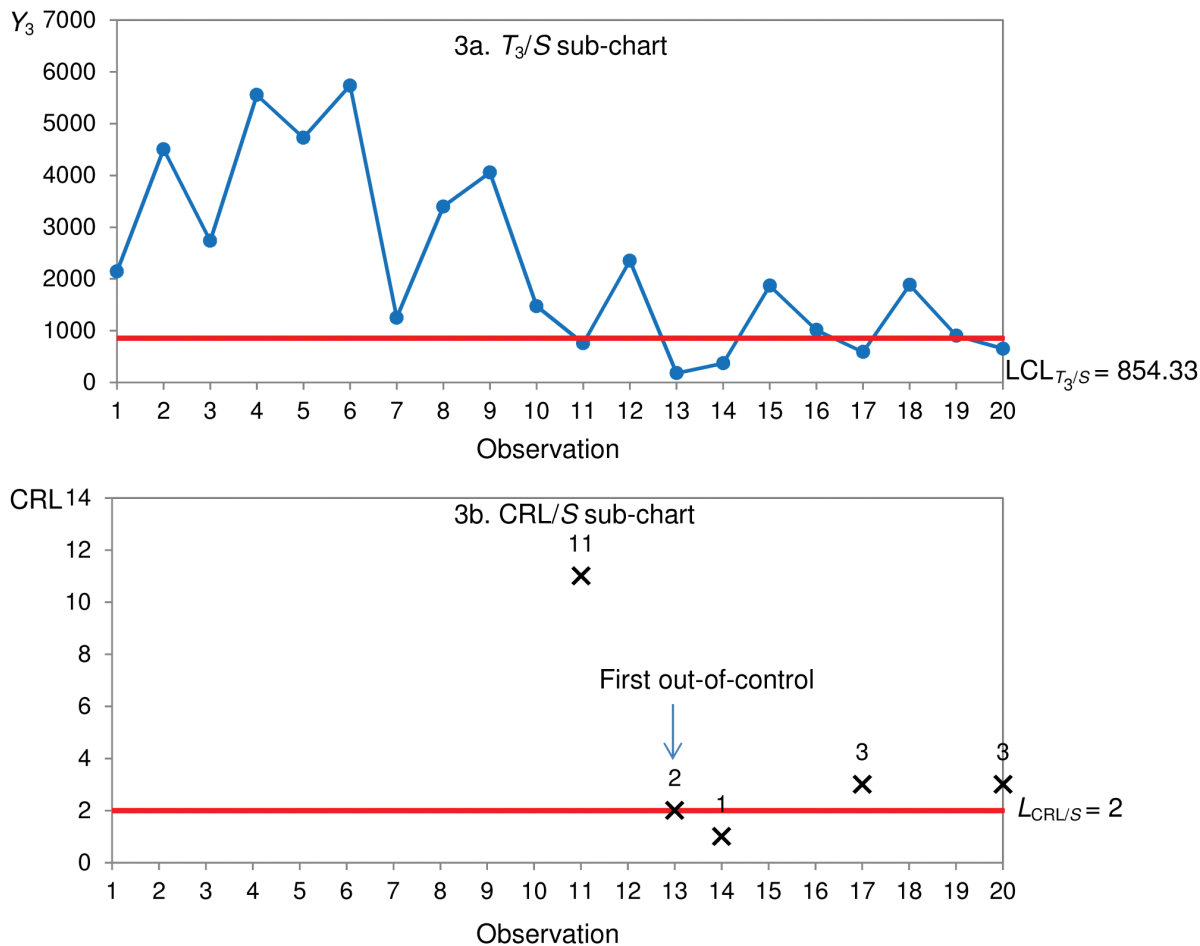

**Figure 3. Synth- $T_3$  chart.**  
doi:10.1371/journal.pone.0065440.g003

### Performance Evaluation Based on ANOS Using the Markov Chain Approach

The performance of a TBE control chart is measured by the average run length (ARL) of the chart, which is defined as the average number of TBE points plotted on the chart before a TBE point indicates an out-of-control signal. Based on this definition, the ARL is appropriate to be used for evaluating the performance of the exponential-type chart, i.e. the  $T$  chart. However, it is not valid to use the ARL while making a comparative study between the exponential-type chart and the Erlang-type chart, i.e. the  $T_r$  chart. This is because the exponential-type chart will signal an out-of-control when a single TBE point falls beyond the control limit. However, the Erlang chart requires that the sum of  $r$  consecutive TBEs is beyond the control limit, in order for the chart to signal. This means that each plotted point on the Erlang chart is not consisting of a single TBE observation. The number of TBE observations to plot a point on the  $T$  and  $T_r$  chart varies. For example, a  $T_3$  chart requires three ( $r=3$ ) consecutive TBE observations in order to plot a point on the chart. In contrast, the  $T$  chart only needs a single TBE observation in plotting a point on the chart.

To overcome this problem, we compute the average number of TBEs observed to signal (ANOS) an out-of-control. The relationship between ANOS and ARL is expressed as

$$ANOS = ARL \times r, \quad (16)$$

where  $r$  is the number of cumulative TBEs before a point is plotted. An exponential-type chart, such as the  $T$  chart, has  $ANOS = ARL$  as  $r=1$ . The relationship between the average time to signal (ATS), which is the average time required for a control chart to signal an out-of-control and the ANOS can be expressed as

$$ATS = ANOS \times \beta = ARL \times r \times \beta. \quad (17)$$

The performance evaluation of the TBE control chart using the ATS and ANOS is similar; the only difference is on their interpretation. However, we prefer to use ANOS over ATS in evaluating the performance of a cumulative quantity control (CQC) chart, like the TBE chart. The ANOS interpretation based on the number of observations is more general and direct compared to the ATS. When the cumulative quantity is measured by say, length, volume, weight, power and so on (other than time) [2], the ATS cannot be relied upon as these quantities are not measured in terms of time. However, ANOS can be used irrespective of whether the quantity is measured in terms of time, length, volume, weight, power, etc.

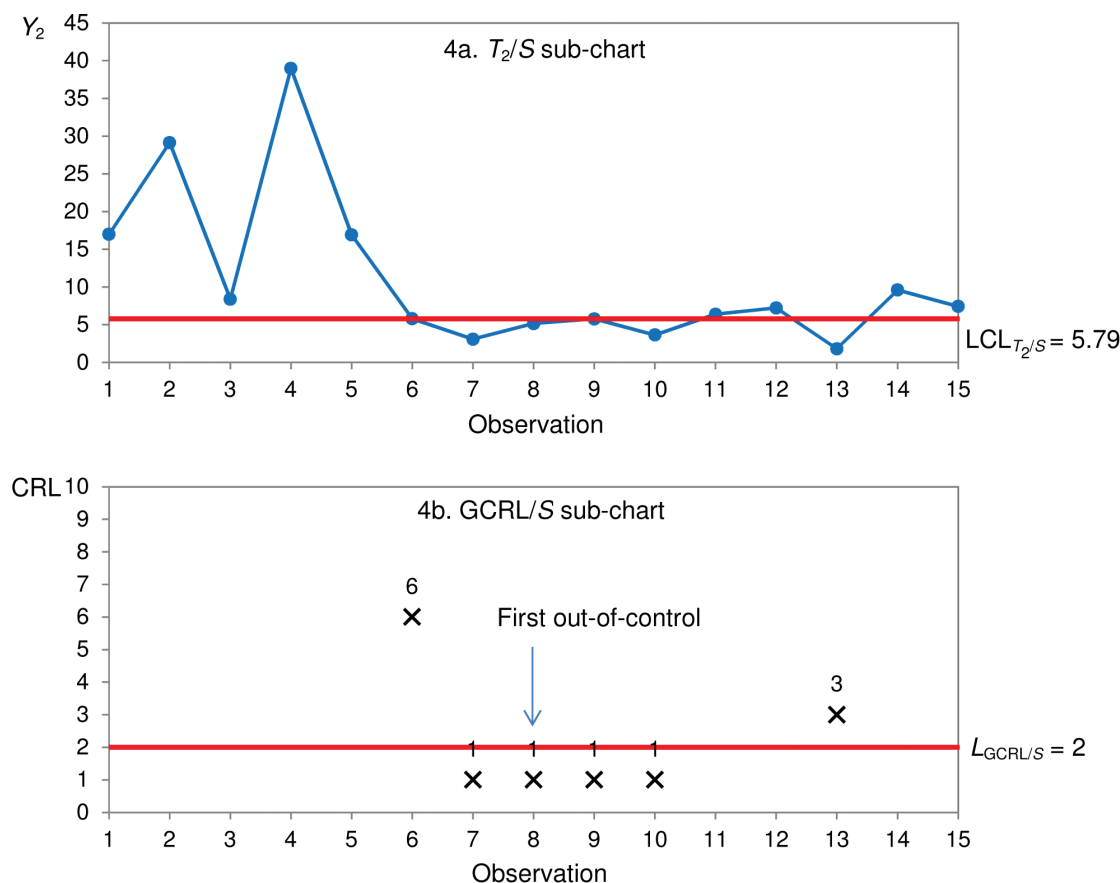

**Figure 4. GR- $T_2$  chart.**

doi:10.1371/journal.pone.0065440.g004

In this paper, a Markov chain method given in Davis & Woodall [42] and Gadre & Rattihalli [49] is adopted in studying the zero- and steady-state ANOS performance of the Synth- $T$  chart proposed by Scariano & Calzada [36], as well as the proposed Synth- $T_r$  chart, GR- $T$  chart and GR- $T_r$  chart.

**Synth- $T_r$  chart.** Let  $Y_r = \sum_{i=1}^r X_i$  be the sum of  $r$  TBEs observed. Suppose that each  $Y_r$  can be classified as either “0” (conforming, i.e.  $Y_r \geq LCL_{T_r/S}$ ) or “1” (non-conforming, i.e.  $Y_r < LCL_{T_r/S}$ ). Define

$$A = P(Y_r \geq LCL_{T_r/S}) = 1 - F_{T_r}(LCL_{T_r/S})$$

$$= \sum_{k=0}^{r-1} \frac{(LCL_{T_r/S}/\beta)^k}{k!} \exp\left(-\frac{LCL_{T_r/S}}{\beta}\right), \quad (18)$$

and  $B = 1 - A$ . Consider the case when the lower limit of the CRL/ $S$  sub-chart,  $L_{CRL/S} = L = 3$ . The Synth- $T_r$  chart will signal if  $CRL \leq L = 3$ . The Markov chain that represents this situation has the following transition probability matrix (TPM) [42]:

$$\begin{matrix} & \begin{matrix} 1 & 2 & 3 & 4 & 5 \end{matrix} \\ \begin{matrix} 1 \\ 2 \\ 3 \\ 4 \\ 5 \end{matrix} & \begin{pmatrix} A & B & 0 & 0 & 0 \\ 0 & 0 & A & 0 & B \\ 0 & 0 & 0 & A & B \\ A & 0 & 0 & 0 & B \\ 0 & 0 & 0 & 0 & 1 \end{pmatrix} \end{matrix} \quad (19)$$

There are a total of four non-absorbing states (Table 1) with an absorbing state (state 5) in the TPM. A  $4 \times 4$  matrix  $R$  of the non-absorbing states is obtained after the last row and column of the TPM in Equation (19) is removed. In general, the matrix  $R$  of the Synth- $T_r$  chart has  $(L+1)$  non-absorbing states as stated below:

- (1) A sequence of  $L$  zeros, such as State 1 in Table 1 when  $L = 3$ .
- (2) The sequence of  $L$  zeros in (1) is followed by 1 and further added by at most  $(L-1)$  zeros. There are  $L$  such sequences, such as States 2, 3, and 4 in Table 1.

The general matrix  $R$  of non-absorbing states will be a  $(L+1) \times (L+1)$  matrix, which is constructed based on the  $(i,j)^{\text{th}}$  entry of the TPM as follows [49]:



$$R(i,j) = \begin{cases} \begin{matrix} \text{if the } i^{\text{th}} \text{ state leads to the } j^{\text{th}} \text{ state, and} \\ A, \text{ the sequence in the corresponding } j^{\text{th}} \\ \text{state ending with 0} \end{matrix} & \text{if the } i^{\text{th}} \text{ state leads to the } j^{\text{th}} \text{ state, and} \\ \begin{matrix} B, \text{ the sequence in the corresponding } j^{\text{th}} \\ \text{state ending with 1} \end{matrix} & \text{otherwise} \end{cases} \quad (20)$$

The zero-state ANOS of the Synth- $T_r$  chart is

$$\text{ANOS}_{\text{Synth}-T_r} = (\mathbf{S}^T(\mathbf{I}-\mathbf{R})^{-1}\mathbf{1}) \times r. \quad (21)$$

Here,  $\mathbf{S}$  is the  $(L+1) \times 1$  column vector of initial probabilities, “1” for the initial state and “0” for the rest of the cases and  $\mathbf{S}^T = (0, 1, 0, 0, \dots, 0, 0)$  in this synthetic chart;  $\mathbf{I}$  is the identity matrix of size  $(L+1) \times (L+1)$ ;  $\mathbf{1}$  is a column vector of order  $(L+1)$  having all elements unity;  $\mathbf{R}$  is a  $(L+1) \times (L+1)$  matrix of non-absorbing states and  $r$  is the value corresponding to the Synth- $T_r$  chart. When the effect of the head start has faded away, the steady-state performance is an important measure. The steady-state ANOS of the Synth- $T_r$  chart is given by

$$\text{ssANOS}_{\text{Synth}-T_r} = (\mathbf{S}_0^T(\mathbf{I}-\mathbf{R})^{-1}\mathbf{1}) \times r, \quad (22)$$

where the matrix  $\mathbf{I}$ ,  $\mathbf{R}$ , and  $\mathbf{1}$  are as defined before. Here,  $\mathbf{S}_0^T$  is the  $1 \times (L+1)$  steady-state probability row vector with the stationary probabilities of being in each non-absorbing state. In Equation (22),  $\mathbf{S}_0^T$  is obtained by solving the system of linear equations of  $\mathbf{S}_0^T \mathbf{R}_0 = \mathbf{S}_0^T$  subject to  $\mathbf{S}_0^T \mathbf{1} = 1$ , where  $\mathbf{R}_0$  is an adjusted version of  $\mathbf{R}$  which is obtained from  $\mathbf{R}$  after dividing each element by the corresponding row sum [52]. For example, if  $L=3$ ,

$$\mathbf{R}_0 = \begin{pmatrix} A & B & 0 & 0 \\ 0 & 0 & 1 & 0 \\ 0 & 0 & 0 & 1 \\ 1 & 0 & 0 & 0 \end{pmatrix} \quad (23)$$

**Synth-T chart.** It is easy to obtain the zero- and steady-state ANOS of the Synth- $T$  chart by just letting  $r=1$  in the procedure for the Synth- $T_r$  chart.

**GR- $T_r$  chart.** Suppose that each  $Y_r = \sum_{i=1}^r X_i$  can be classified as either “0” (conforming, i.e.  $Y_r \geq \text{LCL}_{T_r/S}$ ) or “1” (non-conforming, i.e.  $Y_r < \text{LCL}_{T_r/S}$ ). Define  $A = P(\text{nextobserved } Y_r \geq \text{LCL}_{T_r/S})$ , i.e. similar to Equation (18), and  $B = 1 - A$ . Consider the case when the lower limit of the GCRL/S sub-chart,  $\text{LGCRL}/S = L=3$ . The GR- $T_r$  chart will signal if either the first or two consecutive  $\text{CRL} \leq L$  for the first time, such that  $\text{CRL}_1 \leq 3$  or  $\text{CRL}_i \leq 3$  and  $\text{CRL}_{i+1} \leq 3$ , for  $i=2, 3, \dots$ . The Markov chain that represents this situation has the following transition probability matrix (TPM) [49]:

$$\begin{matrix} & \begin{matrix} 1 & 2 & 3 & 4 & 5 & 6 & 7 & 8 & 9 & 10 & 11 & 12 & 13 & 14 \end{matrix} \\ \begin{matrix} 1 \\ 2 \\ 3 \\ 4 \\ 5 \\ 6 \\ 7 \\ 8 \\ 9 \\ 10 \\ 11 \\ 12 \\ 13 \\ 14 \end{matrix} & \begin{pmatrix} A & B & 0 & 0 & 0 & 0 & 0 & 0 & 0 & 0 & 0 & 0 & 0 & 0 \\ 0 & 0 & A & 0 & B & 0 & 0 & 0 & 0 & 0 & 0 & 0 & 0 & 0 \\ 0 & 0 & 0 & A & 0 & B & 0 & 0 & 0 & 0 & 0 & 0 & 0 & 0 \\ A & 0 & 0 & 0 & 0 & 0 & B & 0 & 0 & 0 & 0 & 0 & 0 & 0 \\ 0 & 0 & 0 & 0 & 0 & 0 & 0 & A & 0 & 0 & 0 & 0 & 0 & B \\ 0 & 0 & 0 & 0 & 0 & 0 & 0 & 0 & A & 0 & 0 & 0 & 0 & B \\ 0 & 0 & 0 & 0 & 0 & 0 & 0 & 0 & 0 & A & 0 & 0 & 0 & B \\ 0 & 0 & 0 & 0 & 0 & 0 & 0 & 0 & 0 & 0 & A & 0 & 0 & B \\ A & 0 & 0 & 0 & 0 & 0 & 0 & 0 & 0 & 0 & 0 & 0 & 0 & B \\ A & 0 & 0 & 0 & 0 & 0 & 0 & 0 & 0 & 0 & 0 & 0 & 0 & B \\ A & 0 & 0 & 0 & 0 & 0 & 0 & 0 & 0 & 0 & 0 & 0 & 0 & B \\ 0 & 0 & 0 & 0 & 0 & 0 & 0 & 0 & 0 & 0 & 0 & 0 & 0 & 1 \end{pmatrix} \end{pmatrix} \quad (24)$$

There are 13 non-absorbing states (Table 2) with an absorbing state (state 14). A  $13 \times 13$  matrix  $\mathbf{R}$  of non-absorbing states is obtained after the last row and column of the TPM in Equation (24) is removed. In general, the matrix  $\mathbf{R}$  in the TPM of the GR- $T_r$  chart with a value of  $L$  has non-absorbing states as follows [49]:

- (1) A sequence of  $L$  zeros, such as state 1 in Table 2 when  $L=3$ .
- (2) The sequence of  $L$  zeros in (1) is followed by 1 and is further added by at most  $(L-1)$  zeros. There are a total of  $L$  sequences, such as states 2, 3 and 4 in Table 2.
- (3) Each of the sequences in (2) is followed by 1 and is further added by a sequence of at most  $(L-1)$  zeros. The total number of such sequences is  $L^2$ , such as states 5 to 13 in Table 2.

Thus, the GR- $T_r$  chart has a square matrix  $\mathbf{R}$  of order.

$$1 + L + L^2 = L(L+1) + 1, \quad (25)$$

for which the  $(i,j)^{\text{th}}$  element of  $\mathbf{R}$  is as defined in Equation (20).

Similar to Equation (21), the zero-state ANOS of the GR- $T_r$  chart can be computed by

$$\text{ANOS}_{\text{GR}-T_r} = (\mathbf{S}^T(\mathbf{I}-\mathbf{R})^{-1}\mathbf{1}) \times r. \quad (26)$$

Here, the matrix  $\mathbf{R}$  is of size  $(L(L+1)+1) \times (L(L+1)+1)$ ;  $\mathbf{S}$  is a  $(L(L+1)+1) \times 1$  column vector of the initial probabilities such that  $\mathbf{S}^T = (0, 0, 0, 0, 1, 0, 0, \dots, 0, 0)$ ;  $\mathbf{I}$  is the identity matrix of size  $(L(L+1)+1) \times (L(L+1)+1)$ ;  $\mathbf{1}$  is a column vector of order  $(L(L+1)+1)$  having all elements unity; and  $r$  is the value corresponding to the GR- $T_r$  chart. Note that the initial state is state 5 when  $L=3$  (Table 2). Meanwhile, the steady-state ANOS of the GR- $T_r$  chart can be computed by substituting the matrix  $\mathbf{R}$  of the GR- $T_r$  chart into Equation (22), which gives

$$\text{ssANOS}_{\text{GR}-T_r} = (\mathbf{S}_0^T(\mathbf{I}-\mathbf{R})^{-1}\mathbf{1}) \times r. \quad (27)$$

Here, the matrix  $\mathbf{I}$ ,  $\mathbf{R}$ , and  $\mathbf{1}$  are as defined in the zero-state ANOS of the GR- $T_r$  chart while  $\mathbf{S}_0^T$  is a  $1 \times (L(L+1)+1)$  steady-state row vector.  $\mathbf{S}_0^T$  is obtained based on the corresponding  $\mathbf{R}_0$ , which is an adjusted version of matrix  $\mathbf{R}$  with size  $(L(L+1)+1) \times (L(L+1)+1)$ .

**GR- $T$  chart.** The zero- and steady-state ANOS performance of the GR- $T$  chart can be obtained by letting  $r=1$  in the Markov chain procedure of the GR- $T_r$  chart, i.e.

$$\text{ANOS}_{\text{GR}-T} = \mathbf{S}^T (\mathbf{I} - \mathbf{R})^{-1} \mathbf{1} \quad (28)$$

$$\text{ssANOS}_{\text{GR}-T} = \mathbf{S}_0^T (\mathbf{I} - \mathbf{R})^{-1} \mathbf{1} \quad (29)$$

### Optimal Design Based on ANOS

The optimal design procedure for the proposed charts, based on the zero- and steady-state ANOS described in this section is similar to the design presented in Wu and Spedding [41]. To design the proposed Synth- $T_r$ , GR- $T$  and GR- $T_r$  charts, two optimal parameters ( $L$ , LCL) have to be selected. The objective function to be minimized is the out-of-control ANOS( $\hat{\partial}_{\text{opt}}$ ) with an optimal shift size (which is considered large enough to seriously impair the process quality)

$$\hat{\partial}_{\text{opt}} = \frac{\beta_1}{\beta_0}, \quad (30)$$

subject to a specified in-control ANOS ( $\text{ANOS}_0$ ) or an acceptable overall Type-I error probability of  $\alpha$ . The design procedure is summarized using the following steps:

1. Given an in-control mean TBE  $\beta_0$ , specify the desired ANOS<sub>0</sub> and  $\hat{\partial}_{\text{opt}}$ .
2. Initialize  $L=1$ .
3. Let  $\hat{\partial}=1$  (process is in-control when  $\beta_1=\beta_0$ ).
4. Obtain LCL of (i) Synth- $T_r$  chart using Equations (21) and (22), (ii) GR- $T_r$  chart using Equations (26) and (27), or (iii) GR- $T$  chart using Equations (28) and (29), for zero- and steady-state ANOSs, respectively.
5. Let  $\hat{\partial}=\hat{\partial}_{\text{opt}}$ , calculate ANOS( $\hat{\partial}_{\text{opt}}$ ) from the current LCL and  $L$  values.
6. If the current  $L=1$ , or the ANOS( $\hat{\partial}_{\text{opt}}$ ) value of the current  $L$  ( $L \neq 1$ ) is smaller compared to that of ( $L-1$ ), increase  $L$  by one and return to Step 4. Otherwise, go to Step 7.
7. Choose the current LCL and  $L$  values that give the smallest ANOS( $\hat{\partial}_{\text{opt}}$ ) value as the optimal parameters of the proposed chart.
8. Use the optimal LCL in Step 7 as the lower control limit of the  $T/S$  sub-chart or  $T_r/S$  sub-chart. And use the optimal  $L$  as the lower limit of the CRL/ $S$  sub-chart or GCRL/ $S$  sub-chart, depending on which proposed chart is considered.

### Optimization Program

Based on the optimization procedure mentioned in Section 3.3, two Mathematica programs are written to compute the optimal parameters  $L$  and LCL, for the zero- and steady-state ANOS, respectively, for each of the proposed charts. First, the user has to input the desired values of ANOS<sub>0</sub>,  $\hat{\partial}_{\text{opt}}$  and  $\beta_0$ . Since these

programs are designed to run iteratively, the user needs to input the additional information on  $L_{\text{max}}$ , for the program to run until a desired maximum value of  $L$ . The  $L_{\text{max}}$  in this study is set to be 50. However, to reduce computation time, especially when  $r$  is large ( $r \geq 4$ ), the user may use a smaller  $L_{\text{max}}$  to get the same results. After the desired ANOS<sub>0</sub> and  $\hat{\partial}_{\text{opt}}$  are input, running the program will give a set of results comprising the parameters ( $L$ , LCL), for  $L=1, 2, \dots, L_{\text{max}}$ , together with the corresponding ANOS( $\hat{\partial}_{\text{opt}}$ ). The programs will also identify the optimal parameters ( $L$ , LCL) that give the smallest value of ANOS( $\hat{\partial}_{\text{opt}}$ ). After the optimal parameters are obtained, the user has to follow the steps explained in Section 3.1 to implement the optimal Synth- $T_r$ , GR- $T$  and GR- $T_r$  charts. The optimal parameters of the Synth- $T$  chart can also be obtained using the optimization programs for the Synth- $T_r$  chart by letting  $r=1$ .

Additional Mathematica programs are written to compute the optimal parameters ( $\lambda$ , LCL) of the EWMA- $T$  chart and the parameters of the  $T$  chart and  $T_r$  chart. The Mathematica programs for all the charts considered in this paper can be requested from the first author.

### Results and Discussion: The ANOS Performance of the Optimal Synth- $T_r$ , GR- $T$ and GR- $T_r$ Charts

Without loss of generality and for simplicity, consider the case  $\beta_0=1$ . Then the mean TBE  $\beta_1$  has a decreasing shift when  $\beta_1 < 1$  or  $\hat{\partial} < 1$ . The optimization parameters of the Synth- $T$ , Synth- $T_r$ , GR- $T$  and GR- $T_r$  charts together with the corresponding zero- and steady-state ANOS( $\hat{\partial}_{\text{opt}}$ )s are computed using the optimization programs described in Section 3.4. Both the zero- and steady-state ANOS( $\hat{\partial}_{\text{opt}}$ )s together with the optimal parameters ( $L$ , LCL) of the proposed charts (Synth- $T_r$ , GR- $T$  and GR- $T_r$  charts, for  $r=2, 3, 4, 5$ ) are displayed in Table 3, based on ANOS<sub>0</sub>=500 and optimal shift size  $\hat{\partial}_{\text{opt}} \in \{0.2, 0.5\}$ . For the sake of comparison, the ANOS( $\hat{\partial}_{\text{opt}}$ )s of the  $T$ ,  $T_r$  ( $r=2, 3, 4$ ), Synth- $T$  and EWMA- $T$  charts are computed. The optimal parameters ( $\lambda$ , LCL) of the EWMA- $T$  chart are also computed. The results are shown in Table 3.

The smaller the ANOS( $\hat{\partial}_{\text{opt}}$ ) value, the better the chart is, in detecting shifts in the mean TBE. From Table 3, the proposed Synth- $T_r$ , GR- $T$  and GR- $T_r$  charts have better overall performances than the existing  $T$ ,  $T_r$  and Synth- $T$  charts, for the two cases of  $\hat{\partial}_{\text{opt}}=0.2, 0.5$ . Generally, the EWMA- $T$  chart has better performance than the  $T$  and  $T_r$  charts, as well as the Synth- $T$  chart (results are consistent with that reported in Scariano and Calzada [36] and Liu et al. [33]).

For both the zero- and steady-state modes, the proposed GR- $T$  chart has better performance than the  $T$ ,  $T_r$  and Synth- $T$  charts, but the EWMA- $T$  chart is still superior to the GR- $T$  chart. The proposed zero-state Synth- $T_r$  chart surpasses the  $T$ ,  $T_r$ , Synth- $T$  and GR- $T$  charts for both cases of  $\hat{\partial}_{\text{opt}}=0.2, 0.5$  and the EWMA- $T$  chart only when  $\hat{\partial}_{\text{opt}}=0.2$ . The steady-state ANOS performance of the Synth- $T_r$  chart is quite similar to that of the EWMA- $T$  chart in the case of  $\hat{\partial}_{\text{opt}}=0.2$ , but the former is inferior to the latter in the case of  $\hat{\partial}_{\text{opt}}=0.5$ . Overall, the zero-state GR- $T_r$  chart is the best chart for detecting the optimal mean shift, especially when  $\hat{\partial}_{\text{opt}}=0.2$ . The superiority of the proposed charts in comparison with the EWMA- $T$  chart is more obvious for the case of  $\hat{\partial}_{\text{opt}}=0.2$ .

Specifically, if  $\hat{\partial}_{\text{opt}}=0.2$ , the zero-state GR- $T_2$  chart with optimal parameters ( $L$ , LCL)=(2,0.5433) and the corresponding ANOS=3.003 is the most effective chart for detecting the TBE shift of  $\hat{\partial}_{\text{opt}}=0.2$ . While for  $\hat{\partial}_{\text{opt}}=0.5$ , the zero-state GR- $T_5$  chart with optimal parameters ( $L$ , LCL)=(2,2.7365) has the smallest

ANOS of 10.370 among all the charts. Similar to the zero-state mode, the steady-state GR- $T_2$  chart with optimal parameters  $(L, LCL) = (1, 0.7351)$  is the best in detecting  $\hat{\delta}_{\text{opt}} = 0.2$ . However, when  $\hat{\delta}_{\text{opt}} = 0.5$ , the steady-state ANOS (18.227) of the EWMA- $T$  chart is only slightly smaller than that of the GR- $T_5$  (ANOS = 18.561) chart. As the difference is negligible, both charts have quite similar performance. For both the zero- and steady-state cases, the GR- $T_r$  chart with a smaller  $r$  is quicker to detect a larger optimal shift, such as  $\hat{\delta}_{\text{opt}} = 0.2$  (as compared to  $\hat{\delta}_{\text{opt}} = 0.5$ ) as the number of TBE observations needed increases with  $r$ . However, the GR- $T_r$  chart with a larger  $r$  performs better when  $\hat{\delta}_{\text{opt}} = 0.5$  (smaller optimal shift).

For an optimal design based on  $\hat{\delta}_{\text{opt}} = 0.2$  and  $\text{ANOS}_0 = 500$ , Table 4 displays the computed zero- and steady-state ANOS for the EWMA- $T$ , Synth- $T$ , Synth- $T_r$ , GR- $T$  and GR- $T_r$  charts, for various sizes of mean TBE shifts,  $\hat{\delta} \in \{1, 0.95, 0.9, \dots, 0.1, 0.05, 0.01\}$ . Table 4 shows that for the Synth- $T$ , Synth- $T_r$ , GR- $T$  and GR- $T_r$  charts, the performance of the zero-state ANOS is better than that of the steady-state for all shifts. However, the EWMA- $T$  chart has the same performance for the zero- and steady-state modes. Overall, the proposed Synth- $T_r$ , GR- $T$  and GR- $T_r$  charts are superior to the Synth- $T$  chart for all shifts. The GR- $T_r$  chart performs better than its Synth- $T_r$  counterpart, while the GR- $T$  chart has the poorest performance among the three proposed charts.

As compared to the EWMA- $T$  chart, in the zero-state mode, the proposed Synth- $T_4$  and GR- $T_r$  (for  $r = 3$  and 4) charts outperform the EWMA- $T$  chart for all shifts. The ANOSs of the Synth- $T_5$  and GR- $T_5$  charts are smaller than that of the EWMA- $T$  chart for  $0.95 \leq \hat{\delta} < 0.1$ ; however, when the shifts are very large ( $0.1 \leq \hat{\delta} \leq 0.01$ ), the EWMA- $T$  chart slightly outperforms the Synth- $T_5$  and GR- $T_5$  charts. Meanwhile, the Synth- $T_r$  ( $r = 2$  and 3) and GR- $T_2$  charts are more sensitive than the EWMA- $T$  chart for detecting large shifts, but not for small and moderate shifts. Although the GR- $T$  chart is superior to the Synth- $T$  chart, but the former is better than the EWMA- $T$  chart only for detecting large shifts.

In the steady-state mode, the Synth- $T_5$  and GR- $T_r$  ( $r = 3, 4$  and 5) charts always perform better than the EWMA- $T$  chart, for detecting small to certain degrees of large shifts. The Synth- $T_4$  chart is more sensitive than the EWMA- $T$  chart for detecting shifts  $0.2 \leq \hat{\delta} \leq 0.6$ . In addition, the Synth- $T_3$  and GR- $T_2$  charts are superior to the EWMA- $T$  chart for  $0.05 < \hat{\delta} \leq 0.25$ . Meanwhile, the ANOSs of the steady-state Synth- $T_2$  and GR- $T$  charts are always greater than that of the EWMA- $T$  chart, except when the shift is large.

For the zero-state case, we recommend using the Synth- $T_2$  chart, GR- $T_2$  chart or even the GR- $T$  chart, instead of the EWMA- $T$  chart if the detection of large shifts is desirable. For detecting moderate shifts, the Synth- $T_r$  ( $r = 3, 4$  or 5) chart or GR- $T_r$  ( $r = 2, 3, 4$  or 5) chart is recommended while for detecting small shifts, the Synth- $T_r$  ( $r = 4$  or 5) chart or GR- $T_r$  ( $r = 3, 4$  or 5) chart is recommended. For the steady-state case, we recommend the use of the Synth- $T_2$  or GR- $T$  chart for detecting large shifts. However, when detecting shifts  $0.25 \leq \hat{\delta} < 0.10$  is a concern, the Synth- $T_3$  and GR- $T_2$  charts are recommended. For detecting shifts  $0.6 \leq \hat{\delta} < 0.25$ , one can consider the Synth- $T_r$  ( $r = 4$  or 5) or GR- $T_r$  ( $r = 3, 4$  or 5) chart. Furthermore, if only small shifts are to be detected quickly, the Synth- $T_5$  chart or GR- $T_r$  ( $r = 3, 4$  or 5) chart can be considered. Among these charts, the GR- $T_5$  chart is the most sensitive for detecting small shifts.

## Illustrative Examples

To show the implementation and application of the proposed control charts on different events monitoring, we use a real data set on coal mining accidents and two simulated data set, each on time between component failures and waiting times of outpatients in a hospital.

**Example I.** The coal mining accidents data set in Jarrett [9] is taken to illustrate the construction of the proposed GR- $T_3$  chart. The data set can be obtained from <http://www.stat.sc.edu/rsrch/gasp/poicha/mining.dat>. The data consist of the time intervals in days between successive coal mining accidents which involve more than ten men killed during the period 1851 to 1962 in Great Britain. The time between accidents,  $X$  has been shown to be exponentially distributed. The mean of the time between accidents is estimated based on the first 50 observations (similar to [29]) as

$$\hat{E}(X) = \sum_{i=1}^{50} \frac{x_i}{50} = \frac{6082}{50} = 121.64$$

Thus, the in-control mean time between accidents is  $\beta_0 = 121.64$ . As  $r = 3$ , let  $T_3$  denote the time until the 3<sup>rd</sup> accident. The GR- $T_3$  chart (consists of a  $T_3/S$  sub-chart and a GCRL/ $S$  sub-chart) to monitor the coal mining accidents data is shown in Figure 2.

For the GR- $T_3$  chart to be optimal in detecting  $\hat{\delta} = 0.2$  with an in-control zero-state  $\text{ANOS}_0 = 500$ , the chart parameters are obtained from Table 3. When  $\beta_0 = 1$ , the optimal parameters for the zero-state GR- $T_3$  chart are  $(L, LCL) = (1, 1.4621)$ . Thus, the  $T_3/S$  sub-chart and GCRL/ $S$  sub-chart have lower control limits,  $LCL_{T_3/S} \times \beta_0 = 1.4621 \times 121.64 = 177.85$  and  $L_{GCRL/S} = 1$  respectively, as optimal parameters. In Figure 2a, the  $T_3/S$  sub-chart having four observations  $T_3$  below  $LCL_{T_3/S} = 177.85$  indicates the occurrence of four non-conforming  $T_3$  observations. Thus, the GCRL/ $S$  sub-chart has  $CRL_1 = 3$ ,  $CRL_2 = 10$ ,  $CRL_3 = 5$  and  $CRL_4 = 4$  (Figure 2b). The GR- $T_3$  chart does not show any out-of-control signal as none of the CRL values is less than or equal to  $L_{GCRL/S} = 1$ . This indicates that the coal mining accidents events are in-control.

**Example II.** A set of simulated components failure data is taken from Xie et al. [5]. The data consist of 60 observations on the time between components failures. The first 30 observations were simulated from an in-control mean time between failures  $\beta_0 = 1000$ , and the remaining 30 observations were simulated from an out-of-control mean time between failures  $\beta_1 = 333.33$ . To construct a Synth- $T_3$  chart, the cumulative time of every three consecutive time between failure observations,  $T_3$  was recorded [5]. The optimal parameters  $(L, LCL) = (2, 854.33)$  of the Synth- $T_3$  chart in optimally detecting a mean shift of  $\hat{\delta}_{\text{opt}} = 333.33/1000 = 0.33$ , based on  $\text{ANOS}_0 = 500$  are computed using the optimization program mentioned in Section 3.4. The Synth- $T_3$  chart with  $LCL_{T_3/S} = 854.33$  for the  $T_3/S$  sub-chart and  $L_{GCRL/S} = 2$  for the CRL/ $S$  sub-chart is constructed in Figure 3.

An observation  $T_3$  below  $LCL_{T_3/S}$  is an indication of a non-conforming observation (Figure 3a). Thus, the CRL/ $S$  sub-chart (Figure 3b) has  $CRL_1 = 11$ ,  $CRL_2 = 2$ ,  $CRL_3 = 1$ ,  $CRL_4 = 3$  and  $CRL_5 = 3$ . Since  $CRL_2 \leq L_{GCRL/S}$  and  $CRL_3 \leq L_{GCRL/S}$  out-of-control time between failures of the components are detected at observations 13 and 14. The Synth- $T_3$  shows that the first out-of-control signal occurs at observation 13 (Figure 3b), which corresponds to the 39<sup>th</sup> ( $13 \times 3$ ) failure.

**Example III.** Assume that the waiting time of outpatients in a hospital follows the exponential distribution with the mean waiting time of ten minutes ( $\beta_0 = 10$ ). To reduce the mean waiting time from ten minutes to three minutes ( $\beta_1 = 3$ ), a control chart is used to monitor the improvement in hospital services. The simulated waiting time data given in Xie et al. [8] are considered. The first 10 observations were simulated with  $\beta_0 = 10$  and the last 20 observations with  $\beta_1 = 3$ . In order to construct a GR- $T_2$  chart, the sum of every two waiting time observations,  $T_2$  is recorded. By setting  $\text{ANOS}_0 = 370$  (similar to Xie et al. [8]), the GR- $T_2$  chart having optimal parameters  $(L, \text{LCL}) = (2, 5.79)$  is designed to optimally detect a TBE mean shift,  $\hat{\sigma}_{\text{opt}} = 3/10 = 0.3$ . A GR- $T_2$  chart which consists of a  $T_2/S$  sub-chart ( $\text{LCL}_{T_2/S} = 5.79$ ) and a GCRL/ $S$  sub-chart ( $L_{\text{GCRL}/S} = 2$ ) is displayed in Figure 4.

An observation  $T_2$  falling below  $\text{LCL}_{T_2/S}$  in the  $T_2/S$  sub-chart (Figure 4a) is non-conforming. In the GCRL/ $S$  sub-chart (Figure 4b),  $\text{CRL}_1 = 6$ ,  $\text{CRL}_2 = 1$ ,  $\text{CRL}_3 = 1$ ,  $\text{CRL}_4 = 1$ ,  $\text{CRL}_5 = 1$  and  $\text{CRL}_6 = 3$ . Since  $\text{CRL}_1 > L_{\text{GCRL}/S}$ , no out-of-control signal is given at observation 6. The GR- $T_2$  chart issues the first out-of-control signal at observation 8 as  $\text{CRL}_2 \leq L_{\text{GCRL}/S}$  and  $\text{CRL}_3 \leq L_{\text{GCRL}/S}$  (Figure 4b), which corresponds to the 16<sup>th</sup> ( $8 \times 2$ ) waiting time.

## Conclusion

Among the existing  $T$ ,  $T_r$ , Synth- $T$  and EWMA- $T$  charts, the  $T$  chart is the least sensitive in the detection of all sizes of shifts. The  $T_r$  and Synth- $T$  charts are better than the EWMA- $T$  chart only for detecting large mean TBE shifts. This study proposes three charts, i.e. the Synth- $T_r$ , GR- $T$  and GR- $T_r$  charts, to increase the sensitivity of TBE type charts toward mean TBE shifts. The objective of this study is attained as the zero-state Synth- $T_4$  and GR- $T_r$  ( $r = 3$  or  $4$ ) charts can be used in place of the existing TBE type charts for quicker detection of mean TBE shifts. However, for the steady-state process, the choice between the two best overall charts, namely the existing EWMA- $T$  and proposed GR- $T_r$  ( $r = 3, 4$  or  $5$ ) charts can be made under different shift intervals, deemed important for a quick detection.

From the results, in general, the superiority of the proposed charts to the existing  $T$ ,  $T_r$ , Synth- $T$  and EWMA- $T$  charts is more obvious when the charts are optimally designed for detecting small and moderate shifts. The zero- and steady-state cases of the proposed Synth- $T_r$ , GR- $T$  and GR- $T_r$  charts outperform that of

the  $T$ ,  $T_r$  and Synth- $T$  charts in detecting all sizes of mean shifts. In comparison with the EWMA- $T$  chart for the zero-state case, the Synth- $T_4$  and GR- $T_r$  ( $r = 3$  or  $4$ ) charts are superior toward all shifts, whereas the Synth- $T_r$  ( $r = 2$  or  $3$ ) and GR- $T_2$  charts perform better for moderate and large shifts; and the GR- $T$  chart is the most effective only for detecting large shifts. For the steady-state process, the Synth- $T_5$  and GR- $T_r$  ( $r = 3, 4$  or  $5$ ) charts are more sensitive than the EWMA- $T$  chart for detecting small and moderate shifts. The Synth- $T_4$  chart surpasses the EWMA- $T$  chart for moderate shifts. For detecting large shifts, the Synth- $T_2$  and GR- $T$  charts perform best.

Although increasing  $r$  results in quicker detection of small and moderate mean shifts, but it also reduces the speed of detecting large shifts (and even some moderate shifts). Furthermore, the value of  $r$  should not be too large (e.g.,  $r > 5$ ) so that the waiting time for decision making will not be too long, especially for a process with infrequent occurrences of events.

The implementation of the synthetic-type TBE control charts that involves some calculations and procedures will not be a problem to practitioners due to the availability of powerful and advanced computers, as well as user friendly softwares that will perform all the complicated calculations. This enables the control limits of the  $T/S$  or  $T_r/S$  sub-chart and CRL/ $S$  or GCRL/ $S$  sub-chart to be easily computed via the use of a computer.

Research works of the proposed charts with estimated parameters, the robustness study of the charts and the statistical and economic designs of the charts, based on the average number of observations to signal (ANOS) or median number of observations to signal can be carried out in future to increase the competitiveness of the charts and to enhance the charts' practical advantages.

## Supporting Information

### Appendix S1 (DOC)

## Author Contributions

Conceived and designed the experiments: FYY. Performed the experiments: FYY. Analyzed the data: FYY. Contributed reagents/materials/analysis tools: FYY. Wrote the paper: FYY. Checked and edited the manuscript: KMBC LMH.

## References

- Montgomery DC (2009) Statistical quality control: A modern introduction; John Wiley.
- Xie M, Goh TN, Kuralmani V (2002) Statistical models and control charts for high quality processes: Springer.
- Calvin TW (1983) Quality control techniques for 'zero-defects'. IEEE Transactions on Components, Hybrids, and Manufacturing Technology 6: 323–328.
- Goh TN (1987) A control chart for very high yield processes. Quality Assurance 13: 18–22.
- Xie M, Goh TN, Ranjan P (2002) Some effective control chart procedures for reliability monitoring. Reliability Engineering & System Safety 77: 143–150.
- Khoo MBC, Xie M (2009) A study of time-between-events control chart for the monitoring of regularly maintained systems. Quality and Reliability Engineering International 25: 805–819.
- Prasad SR, Rao BS, Kantham RRL (2011) Assessing software reliability using inter failures time data. International Journal of Computer Applications 18: 1–3.
- Xie YJ, Tsui KL, Xie M, Goh TN. Monitoring time-between-events for health management; 2010. 1–8.
- Jarrett RG (1979) A note on the intervals between coal mining disasters. Biometrika 66: 191–193.
- Doğu E (2012) Monitoring time between medical errors to improve health-care quality. International Journal for Quality Research 6: 151–157.
- Luo P, DeVol TA, Sharp JL (2012) CUSUM analyses of time-interval data for online radiation monitoring. Health Physics 102: 637–645. doi:10.1097/HP.1090b1013e3182430106.
- Alemi F, Neuhauser D (2004) Time-between control charts for monitoring asthma attacks. Joint Commission Journal on Quality and Patient Safety 30: 95–102.
- Thor J, Lundberg J, Ask J, Olsson J, Carli C, et al. (2007) Application of statistical process control in healthcare improvement: systematic review. Quality and Safety in Health Care 16: 387–399.
- Woodall WH (2006) The use of control charts in health-care and public-health surveillance. Journal of Quality Technology 38: 89–104.
- Radaelli G (1998) Planning time-between events Shewhart control charts. Total Quality Management 9: 133–140.
- Xie W, Xie M, Goh TN (1995) A Shewhart-like charting technique for high yield processes. Quality and Reliability Engineering International 11: 189–196.
- Bourke PD (1991) Detecting shift in fraction nonconforming using run length control charts with 100% inspection. Journal of Quality Technology 23: 225–238.
- Xie M, Goh TN (1997) The use of probability limits for process control based on geometric distribution. International Journal of Quality and Reliability Management 14: 64–73.
- Ohta H, Kusukawa E, Rahim A (2001) A CCC-r chart for high-yield processes. Quality and Reliability Engineering International 17: 439–446.

20. Albers W (2010) The optimal choice of negative binomial charts for monitoring high-quality processes. *Journal of Statistical Planning and Inference* 140: 214–225.
21. Chan LY, Xie M, Goh TN (2000) Cumulative quantity control charts for monitoring production processes. *International Journal of Production Research* 38: 397–408.
22. Qu L, Wu Z, Liu T-I (2011) A control scheme integrating the T chart and TCUSUM chart. *Quality and Reliability Engineering International* 27: 529–539.
23. Zhang CW, Xie M, Liu JY, Goh TN (2007) A control chart for the Gamma distribution as a model of time between events. *International Journal of Production Research* 45: 5649–5666.
24. Vardeman S, Ray D (1985) Average run length for CUSUM schemes when observations are exponentially distributed. *Technometrics* 27: 145–150.
25. Gan FF (1994) Design of optimal exponential CUSUM control charts. *Journal of Quality Technology* 26: 109–124.
26. Xie M, Goh TN, Lu XS (1998) A comparative study of CCC and CUSUM charts. *Quality and Reliability Engineering International* 14: 339–345.
27. Bourke PD (2001) The geometric CUSUM chart with sampling inspection for monitoring fraction defective. *Journal of Applied Statistics* 28: 951–972.
28. Sun J, Zhang GX (2000) Control charts based on the number of consecutive conforming items for the near zero-nonconformity processes. *Total Quality Management* 11: 235–250.
29. Gan FF (1998) Designs of one- and two-sided exponential EWMA charts. *Journal of Quality Technology* 30: 55–69.
30. Ozsan G, Testik MC, Weib HC (2010) Properties of the exponential EWMA chart with parameter estimation. *Quality and Reliability Engineering International* 26: 555–569.
31. Pehlivan C, Testik MC (2010) Impact of model misspecification on the exponential EWMA charts: A robustness study when the time-between-events are not exponential. *Quality and Reliability Engineering International* 26: 177–190.
32. Borror CM, Keats JB, Montgomery DC (2003) Robustness of the time between events CUSUM. *International Journal of Production Research* 41: 3435–3444.
33. Liu JY, Xie M, Goh TN, Sharma P (2006) A comparative study of exponential time between events charts. *Quality Technology and Quantitative Management* 3: 347–359.
34. Sharma PR, Xie M, Goh TN (2006) Monitoring inter-arrival times with statistical control charts. In: Pham H, editor. *Reliability Modelling, Analysis and Optimisation*: World Scientific. 43–66.
35. Liu JY, Xie M, Goh TN, Ranjan P (2004) Time-between-events charts for on-line process monitoring. *IEEE International Engineering Management Conference*. 1061–1065.
36. Scariano SM, Calzada ME (2003) A note on the lower-sided synthetic chart for exponentials. *Quality Engineering* 15: 677–680.
37. Zhang HY, Xie M, Goh TN, Shamsuzzaman M. Economic design of integrated time-between-events chart system with independent quality characteristics; 2007. 1408–1412.
38. Zhang CW, Xie M, Goh TN (2005) Economic design of exponential charts for time between events monitoring. *International Journal of Production Research* 43: 5019–5032.
39. Zhang HY, Xie M, Goh TN, Shamsuzzaman M (2011) Economic design of time-between-events control chart system. *Computers & Industrial Engineering* 60: 485–492.
40. Jones LA, Champ CW (2002) Phase I control charts for times between events. *Quality and Reliability Engineering International* 18: 479–488.
41. Wu Z, Spedding TA (2000) A synthetic control chart for detecting small shifts in the process mean. *Journal of Quality Technology* 32: 32–38.
42. Davis RB, Woodall WH (2002) Evaluating and improving the synthetic control chart. *Journal of Quality Technology* 34: 200–208.
43. Wu Z, Yeo SH, Spedding TA (2001) A synthetic control chart for detecting fraction nonconforming increases. *Journal of Quality Technology* 33: 104–111.
44. Scariano SM, Calzada ME (2009) The generalized synthetic chart. *Sequential Analysis* 28: 54–68.
45. Ghute VB, Shirke DT (2008) A multivariate synthetic control chart for monitoring process mean vector. *Communications in Statistics - Theory and Methods* 37: 2136–2148.
46. Khoo MBC, Wu Z, Castagliola P, Lee HC (2013) A multivariate synthetic double sampling  $T^2$  control chart. *Computers & Industrial Engineering* 64: 179–189.
47. Khoo MBC, Wong VH, Wu Z, Castagliola P (2011) Optimal designs of the multivariate synthetic chart for monitoring the process mean vector based on median run length. *Quality and Reliability Engineering International* 27: 981–997.
48. Yeong WC, Khoo MBC, Wu Z, Castagliola P (2012) Economically optimum design of a synthetic  $\bar{X}$  chart. *Quality and Reliability Engineering International* 28: 725–741.
49. Gadre MP, Rattihalli RN (2004) A group run control chart for detecting shifts in the process mean. *Economic Quality Control* 19: 29–43.
50. Liu JY, Xie M, Goh TN (2006) Some advanced control charts for monitoring weibull-distributed time between events. In: Yun WY, Dohi T, editors. *Advanced Reliability Modelling II: Reliability Testing and Improvement* 739–746.
51. Brook D, Evans DA (1972) An approach to the probability distribution of CUSUM run length. *Biometrika* 59: 539–549.
52. Khilare SK, Shirke DT (2012) Nonparametric Synthetic Control Charts for Process Variation. *Quality and Reliability Engineering International* 28: 193–202.
53. Zhang LY, Chen G, Castagliola P (2009) On t and EWMA t charts for monitoring changes in the process mean. *Quality and Reliability Engineering International* 25: 933–945.
54. Reynolds MRJ, Amin RW, Arnold JC (1990) CUSUM charts with variable sampling intervals. *Technometrics* 32: 371–384.
